# Supplementary material
Source: MDPI journal article supplement (https://www.mdpi.com/2227-7102/12/10/644)
Supplement: s1 [file s1]

## Supplementary Material

**Table S1.** Interrater reliability statistics and percent agreement for the first group of responses for each argumentation task, all plastic responses, and all wind responses. Adjusted Cohen's Kappa was calculated according to the formula in [63] and discussed in [61,62].

| <i>Responses</i>     | <i>Variables</i>      | <i>Percent Agreement</i> | <i>Cohen's Kappa</i> | <i>Adjusted Cohen's Kappa</i> |
|----------------------|-----------------------|--------------------------|----------------------|-------------------------------|
| <i>Plastic #1-25</i> | Claim                 | 100                      | 1.000                | 1                             |
|                      | Reasons               | 88                       | 0.733                | 0.76                          |
|                      | Counterargument       | 96                       | 0.905                | 0.92                          |
|                      | Basic refutation      | 88                       | 0.503                | 0.76                          |
|                      | Integrated refutation | 84                       | 0.565                | 0.68                          |
| <i>All plastic</i>   | Claim                 | 100                      | 1.000                | 1                             |
|                      | Reasons               | 95.556                   | 0.848                | 0.911                         |
|                      | Counterargument       | 84.444                   | 0.654                | 0.689                         |
|                      | Basic refutation      | 87.778                   | 0.388                | 0.756                         |
|                      | Integrated refutation | 81.111                   | 0.572                | 0.622                         |
| <i>Wind #1-30</i>    | Claim                 | 100                      | 1.000                | 1.000                         |
|                      | Reasons               | 100                      | 1.000                | 1.000                         |
|                      | Counterargument       | 93.333                   | 0.842                | 0.867                         |
|                      | Basic refutation      | 100                      | 1.000                | 1.000                         |
|                      | Integrated refutation | 96.667                   | 0.911                | 0.933                         |
| <i>All wind</i>      | Claim                 | 100                      | 1.000                | 1.000                         |
|                      | Reasons               | 98.889                   | 0.970                | 0.978                         |
|                      | Counterargument       | 93.333                   | 0.827                | 0.867                         |
|                      | Basic refutation      | 92.778                   | 0.513                | 0.856                         |
|                      | Integrated refutation | 89.444                   | 0.674                | 0.789                         |
| <i>Water #1-36</i>   | Claim                 | 100                      | 1.000                | 1.000                         |
|                      | Reasons               | 97.222                   | 0.936                | 0.944                         |
|                      | Counterargument       | 94.444                   | 0.870                | 0.889                         |
|                      | Basic refutation      | 91.667                   | 0.833                | 0.833                         |
|                      | Integrated refutation | 94.444                   | 0.889                | 0.889                         |
