# Supplementary material
Source: MDPI journal article supplement (https://www.mdpi.com/2227-7102/12/10/644)
Supplement: s1 [file s1]

Archive with 2 entries (2 files):
- EducationSciences_CIA_SSI_2022_supplemental_TableS1.pdf
- EducationSciences_CIA_SSI_2022_supplemental_TableS2.pdf
